# Supplementary material
Source: PubMed Central journal article supplement (PMC7316530)
Supplement: NIHMS1552755-supplement-Supp_FigS4.pdf [file NIHMS1552755-supplement-Supp_FigS4.pdf]

## Suppl. Figure 4

|          | Transmembrane |   |   |   |   |   |   |   |   |   |   |   |   |   |   |   |   |   |   |   |   |
|----------|---------------|---|---|---|---|---|---|---|---|---|---|---|---|---|---|---|---|---|---|---|---|
| BTC      | L             | V | V | C | L | I | V | V | M | V | V | F | I | I | L | V | I | G | V | C | T |
| BTC-S44  | L             | V | V | C | L | I | V | V | S | V | V | F | I | I | L | V | I | G | V | C | T |
| BTC-S52  | L             | V | V | C | L | I | V | V | M | V | V | F | I | I | L | V | S | G | V | C | T |
| BTC1     | L             | V | G | S | L | I | V | V | M | V | V | F | I | I | P | V | I | G | V | C | T |
| BTC1-S44 | L             | V | G | S | L | I | V | V | S | V | V | F | I | I | P | V | I | G | V | C | T |
| BTC1-S52 | L             | V | G | S | L | I | V | V | M | V | V | F | I | I | P | V | S | G | V | C | T |
| BTC2     | L             | V | G | S | L | I | V | V | S | V | V | F | I | I | P | V | S | G | V | C | T |

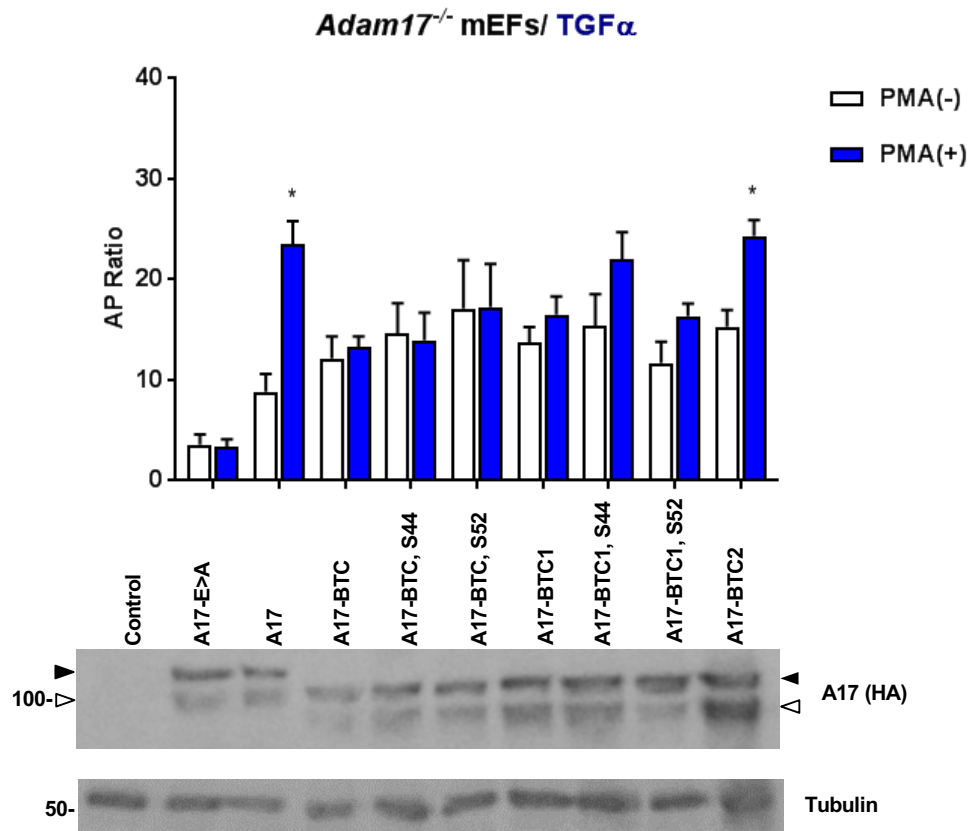

**Supplementary Figure 4. Test of how introduction of individual serine residues in the TMD of A17-BTC and A17-BTC1 affects the ability of these constructs to rescue constitutive and PMA-stimulated shedding of TGF $\alpha$  from A17<sup>-/-</sup> mEFs.** Point mutations were generated in A17-BTC or A17-BTC1 by adding individual Serine residues (S44, S52) into A17-BTC or A17-BTC1 (see table in top panel, Serine residues highlighted in green), and the resulting constructs were tested for their ability to rescue constitutive or PMA-stimulated TGF $\alpha$  shedding from *Adam17*<sup>-/-</sup> mEFs (25 ng/ml PMA, 1 hour). The addition of either S44 or S52 into A17-BTC or A17-BTC1 did not significantly affect the constitutive or stimulated activity of these constructs compared to A17-BTC or A17-BTC1. Black arrowhead, pro-ADAM17; white arrowhead, mature ADAM17. All mutants were expressed at comparable levels, as assessed by Western Blot analysis. Results are presented as mean  $\pm$  SEM (n=3). \*P $\leq$ 0.05.
